# Supplementary material for: A Shift in Glycerolipid Metabolism Defines the Follicular Fluid of IVF Patients with Unexplained Infertility
Source: MDPI journal article supplement (doi:10.3390/biom10081135), 2020-07-31
Supplement: s1 [file s1]

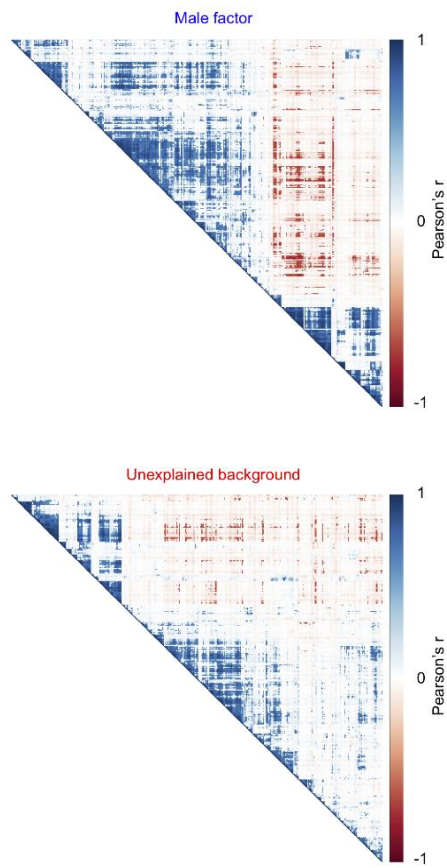

**Supplementary Figure 1:** Hierarchically clustered heat-map visualization of the Pearson's correlation matrices between 401 annotated features for Male factor (top) and Unexplained background (bottom). Only significant correlations ( $p < 0.001$ ) were plotted.
